# Supplementary material for: Risk factors for aseptic loosening of Müller-type straight stems: A registry-based analysis of 828 consecutive cases with a minimum follow-up of 16 years
Source: PubMed Central journal article supplement — Acta Orthop. 2013 Sep 2;84(4):353–9. doi: 10.3109/17453674.2013.810517 (PMC3768033; doi:10.3109/17453674.2013.810517), 2013-09-02
Supplement: ORT-84-353-s5747.pdf [file ORT-84-353-s5747.pdf]

## Supplementary article data

# Risk factors for aseptic loosening of Müller-type straight stems

## A registry-based analysis of 828 consecutive cases with a minimum follow-up of 16 years

Martin Clauss<sup>1</sup>, Silke Gersbach<sup>1</sup>, Andre Butscher<sup>2</sup>, and Thomas Ilchmann<sup>1</sup>

<sup>1</sup>Clinic for Orthopedic and Trauma Surgery, Kantonsspital Baselland Liestal; <sup>2</sup>RMS Foundation, Bettlach, Switzerland.

Correspondence: martin.clauss@ksli.ch

Submitted 12-07-12. Accepted 13-04-11

### Supplementary data

Table 2. Technical details of the 4 stems investigated

|                                            | MSS Co             | MSS Ti      | SL Ti                                                      | SL Co                           |
|--------------------------------------------|--------------------|-------------|------------------------------------------------------------|---------------------------------|
| Material specification                     | ISO 5832-6         | ISO 5832-11 | ISO 5832-11                                                | ISO 5832-6                      |
| Modulus of elasticity                      | 220 GPa            | 110 GPa     | 110 GPa                                                    | 220 GPa                         |
| Surface finish                             | homogenous blasted |             | proximal third rough-blasted,<br>distal two-thirds blasted |                                 |
| Surface roughness ( $R_a$ ), $\mu\text{m}$ | 0.5–1.5            | 1–2         | proximal 3–5,<br>distal 0.5–1.5                            | proximal 4–6,<br>distal 0.5–1.5 |

## Supplementary data

Table 5. Crude and adjusted risk ratios (RRs) for aseptic loosening of Müller-type straight stems

| Covariates   | n   |    | Aseptic loosening |    | Crude RR (95% CI) |         | Adjusted RR (95% CI) |         |
|--------------|-----|----|-------------------|----|-------------------|---------|----------------------|---------|
|              | n   | %  | n                 | %  |                   | p-value |                      | p-value |
| Design       |     |    |                   |    |                   |         |                      |         |
| SL           | 389 | 47 | 84                | 22 | 2.2 (1.6–3.1)     | < 0.001 | 1.5 (1.1–2.3)        | 0.03    |
| MSS          | 439 | 53 | 55                | 13 | ref. group        |         | ref. group           |         |
| Material     |     |    |                   |    |                   |         |                      |         |
| Ti           | 500 | 60 | 114               | 23 | 3.6 (2.3–5.5)     | < 0.001 | 3.2 (2–5)            | < 0.001 |
| Co           | 328 | 40 | 25                | 8  | ref. group        |         | ref. group           |         |
| Age          |     |    |                   |    |                   |         |                      |         |
| < 50 years   | 28  | 3  | 8                 | 29 | 3.1 (1.3–7.3)     | 0.01    | 3.9 (1.6–9.3)        | 0.002   |
| 50–59 years  | 113 | 14 | 33                | 29 | 3.1 (1.7–5.7)     | < 0.001 | 2.9 (1.5–5.3)        | 0.001   |
| 60–75 years  | 454 | 55 | 83                | 18 | 2.0 (1.2–3.5)     | 0.01    | 2.1 (1.2–3.7)        | 0.009   |
| > 75 years   | 233 | 28 | 15                | 6  | ref. group        |         | ref. group           |         |
| Sex          |     |    |                   |    |                   |         |                      |         |
| male         | 485 | 59 | 106               | 22 | 2.7 (1.8–3.9)     | < 0.001 | 3.0 (2–4.5)          | < 0.001 |
| female       | 343 | 41 | 33                | 10 | ref. group        |         | ref. group           |         |
| Diagnosis    |     |    |                   |    |                   |         |                      |         |
| others       | 43  | 5  | 6                 | 14 | 0.8 (0.4–1.9)     | 0.6     |                      |         |
| IA           | 30  | 4  | 1                 | 3  | 0.2 (0–1.4)       | 0.1     |                      |         |
| Fx           | 55  | 7  | 3                 | 6  | 0.4 (0.1–1.1)     | 0.08    |                      |         |
| OA           | 700 | 85 | 129               | 18 | ref. group        |         |                      |         |
| Offset       |     |    |                   |    |                   |         |                      |         |
| SL stem      | 389 | 47 | 84                | 22 | 3.5 (2–6.2)       | < 0.001 |                      |         |
| MSS lateral  | 250 | 30 | 40                | 16 | 2.1 (1.1–3.7)     | 0.02    |                      |         |
| MSS standard | 189 | 23 | 15                | 8  | ref. group        |         |                      |         |
| Stem size    |     |    |                   |    |                   |         |                      |         |
| 7.5          | 131 | 16 | 34                | 26 | 4.5 (1.9–10.8)    | 0.001   | 4.5 (1.8–11)         | 0.001   |
| 10           | 355 | 43 | 71                | 20 | 3.0 (1.3–6.9)     | 0.01    | 2.4 (1–5.6)          | 0.04    |
| 12.5         | 253 | 31 | 28                | 11 | 1.7 (0.7–4)       | 0.3     | 1.5 (0.6–3.6)        | 0.4     |
| ≥ 15         | 89  | 11 | 6                 | 7  | ref. group        |         | ref. group           |         |
| Cup          |     |    |                   |    |                   |         |                      |         |
| cementless   | 500 | 60 | 116               | 23 | 4.1 (2.6–6.4)     | < 0.001 | 2.4 (1.4–3.9)        | 0.001   |
| cemented     | 328 | 40 | 23                | 7  | ref. group        |         | ref. group           |         |
| Head size    |     |    |                   |    |                   |         |                      |         |
| 28 mm        | 563 | 68 | 118               | 21 | 3.5 (2.1–5.6)     | < 0.001 |                      |         |
| 32 mm        | 265 | 32 | 21                | 8  | ref. group        |         |                      |         |

n represents number of stems.

OA; osteoarthritis; IA: inflammatory arthritis; Fx: fracture.
